# Supplementary material for: Dye wastewater treatment enabled by piezo-enhanced photocatalysis of single-component ZnO nanoparticles
Source: Royal Society of Chemistry journal article supplement (doi:10.1039/d0ra04746e), 2020-01-01
Supplement: d0ra04746e1.pdf [file d0ra04746e1.pdf]

## Supporting Information

### **Dye Wastewater Treatment Enabled by Piezo-enhanced Photocatalysis of Single-component ZnO Nanoparticles**

*Yothin Chimupala<sup>1</sup>, Chitsanupong Phromma<sup>1</sup>, Saranphong Yimklan<sup>2</sup>, Natthawat Semakul<sup>2</sup>, Pipat*

*Ruankham<sup>3,4\*</sup>*

<sup>1</sup> Department of Industrial Chemistry, Faculty of Science, Chiang Mai University, Chiang Mai,  
50200, Thailand

<sup>2</sup> Department of Chemistry, Faculty of Science, Chiang Mai University, Chiang Mai, 50200,  
Thailand

<sup>3</sup> Department of Physics and Materials Science, Faculty of Science, Chiang Mai University,  
Chiang Mai, 50200, Thailand

<sup>4</sup> Research Center in Physics and Astronomy, Faculty of Science, Chiang Mai University, Chiang  
Mai, 50200, Thailand

## Table of Contents

|                                                                                   |    |
|-----------------------------------------------------------------------------------|----|
| 1. Crystallinity .....                                                            | 3  |
| 2. Size distribution of ZnO nanoparticles .....                                   | 4  |
| 3. ZnO nanoparticle formation .....                                               | 6  |
| 4. Electron diffraction pattern and a TEM image .....                             | 7  |
| 5. Thermogravimetric analysis (TGA) and Differential thermal analysis (DTA) ..... | 8  |
| 6. Brunauer–Emmett–Teller (BET) analysis .....                                    | 9  |
| 7. Kinetics Reaction .....                                                        | 10 |
| 8. Comparison to other works .....                                                | 12 |
| References .....                                                                  | 13 |

## 1. Crystallinity

Lattice parameters and crystallite size ( $D_{\text{ZnO}}$ ) were calculated from the XRD spectra (Figure S1) fitted Voigt function by using Bragg's equation and Scherrer equation, respectively. The calculated values are summarized in Table S1.

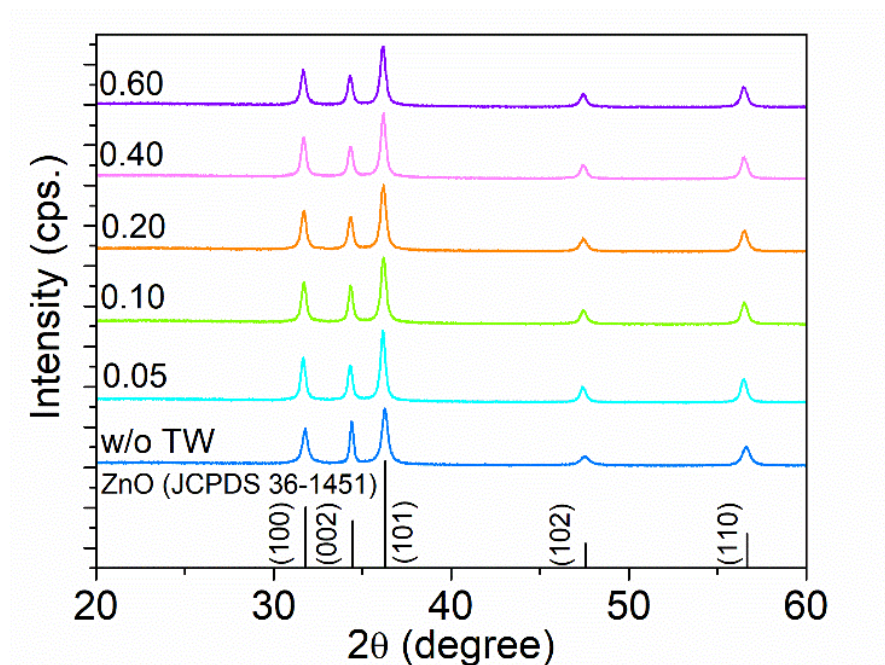

**Figure S1.** XRD patterns of our white precipitates synthesized using Tween80/ $\text{Zn}^{2+}$  molar ratio at 0, 0.05, 0.10, 0.20, 0.40 and 0.60.

**Table S1.** Lattice parameters and crystallite size ( $D_{\text{ZnO}}$ ) of the ZnO nanoparticles.

| Tween80/ $\text{Zn}^{2+}$<br>ratio | Lattice constant |         | $D_{\text{ZnO}}$<br>(nm) |
|------------------------------------|------------------|---------|--------------------------|
|                                    | $a$ (Å)          | $c$ (Å) |                          |
| 0                                  | 3.250            | 5.210   | 21.7                     |
| 0.05                               | 3.260            | 5.222   | 25.4                     |
| 0.10                               | 3.256            | 5.218   | 24.6                     |
| 0.20                               | 3.257            | 5.220   | 23.0                     |
| 0.40                               | 3.258            | 5.220   | 24.9                     |
| 0.60                               | 3.260            | 5.223   | 23.7                     |
| 0.20 (calcined)                    | 3.254            | 5.214   | 30.7                     |

## 2. Size distribution of ZnO nanoparticles

Particle size distribution of ZnO nanoparticles synthesized at various  $\text{Zn}^{2+}/\text{TW}$  molar ratio was determined by image processing via ImageJ software on the observed FE-SEM images. Histograms of the samples are plotted in Figure S2.

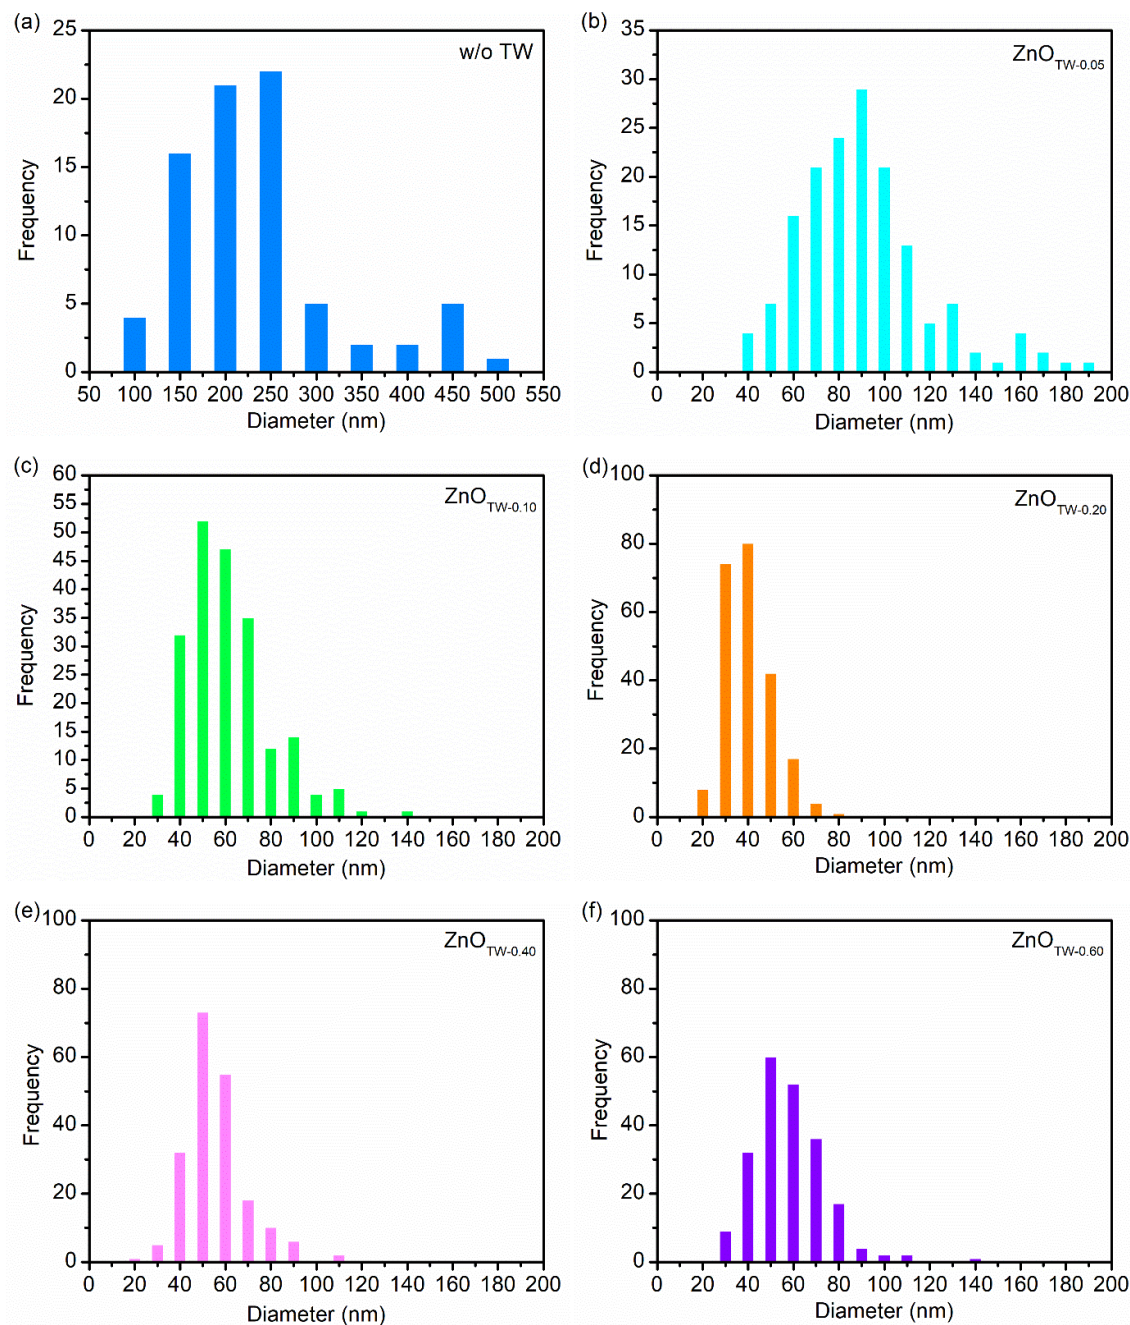

**Figure S2.** Size distribution histogram of (a)  $\text{ZnO}$  synthesized without TW, (b)  $\text{ZnO}_{\text{TW-0.05}}$ , (c)  $\text{ZnO}_{\text{TW-0.10}}$ , (d)  $\text{ZnO}_{\text{TW-0.20}}$ , (e)  $\text{ZnO}_{\text{TW-0.40}}$ , and (f)  $\text{ZnO}_{\text{TW-0.60}}$ .

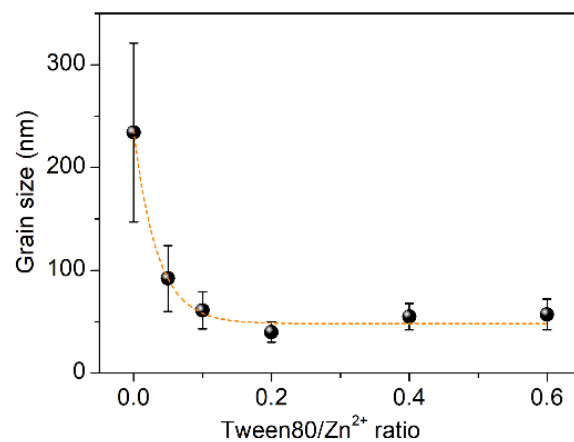

**Figure S3.** The semi-log plot of average grain size of ZnO nanoparticles versus TW/Zn<sup>2+</sup> molar ratio used during the precipitation synthesis. Orange dash line indicates trend based on the average values.

### 3. ZnO nanoparticle formation

Polyoxyethylene sorbitan monooleate (or Tween 80) constitutes a large hydrophilic head (polyoxyethylene sorbitan) and small hydrophobic tail (oleate ester) as shown in Figure S4a, left. This feature makes them curvophilic (Figure S4a, right). In this way, Tween 80 molecules in aqueous solution form a micellar structure as depicted in Figure S4b. Accordingly, the complex formation between hydrophilic head (polyoxyethylene sorbitan) and  $\text{Zn}^{2+}$  ions were proposed. The addition of hydroxide into the resulting  $\text{Zn}^{2+}$ -micelle complex would generate  $\text{Zn}(\text{OH})_n$ -micelle complex. The ZnO nanoparticle formation is arguably dictated by the size of  $\text{Zn}(\text{OH})_n$ -micelle complex.

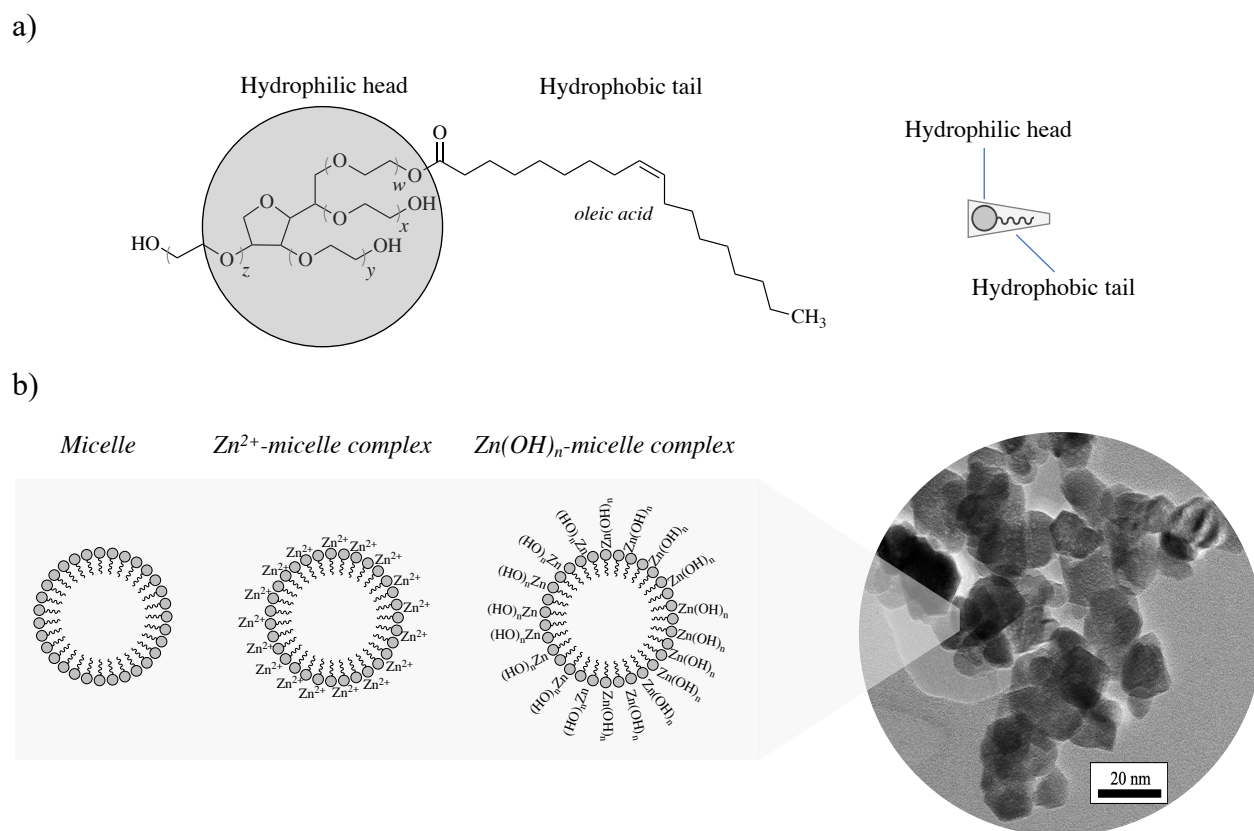

**Figure S4.** a) Chemical structure of polyoxyethylene (20) sorbitan monooleate (or Tween 80) and its simplified drawing of Tween 80 b) Tentative proposal for ZnO nanoparticle formation: spherical micelles in aqueous solution as a template for ZnO nanoparticle

#### 4. Electron diffraction pattern and a TEM image

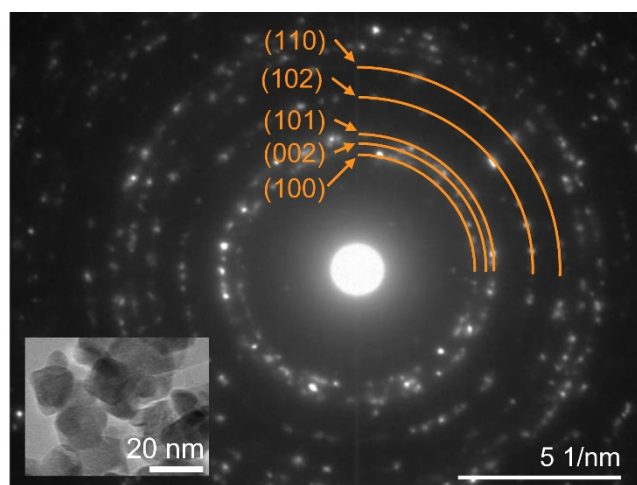

**Figure S5.** Electron diffraction pattern and corresponding TEM image (inset) taken from as-synthesized  $\text{ZnO}_{\text{TW-0.2}}$  nanoparticles.

## 5. Thermogravimetric analysis (TGA) and Differential thermal analysis (DTA)

TGA and DTA were carried out to investigate the residue percentage in the synthesized ZnO nanopowders. The TGA and DTA curves are shown in Figure S6.

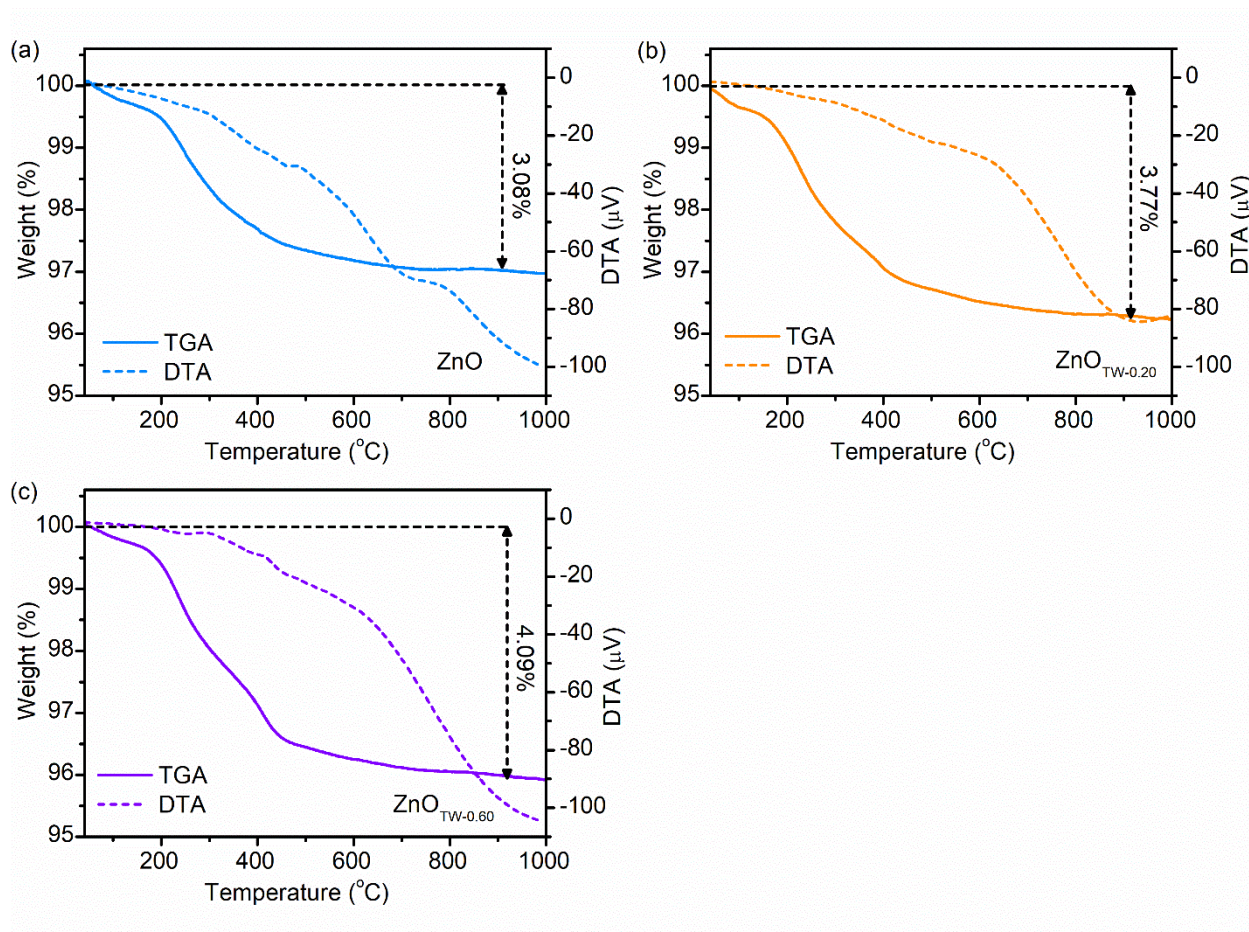

**Figure S6** TGA (solid lines) and DTA (dash lines) curves of (a)  $\text{ZnO}_{\text{TW-0}}$ , (b)  $\text{ZnO}_{\text{TW-0.20}}$ , and (c)  $\text{ZnO}_{\text{TW-0.60}}$ .

## 6. Brunauer–Emmett–Teller (BET) analysis

N<sub>2</sub> adsorption–desorption isotherms (Figure S7) of ZnO and ZnO<sub>TW-0.20</sub> nanopowder were measured to determine surface area and porosity. The surface area (Table S2) was calculated by using BET method.

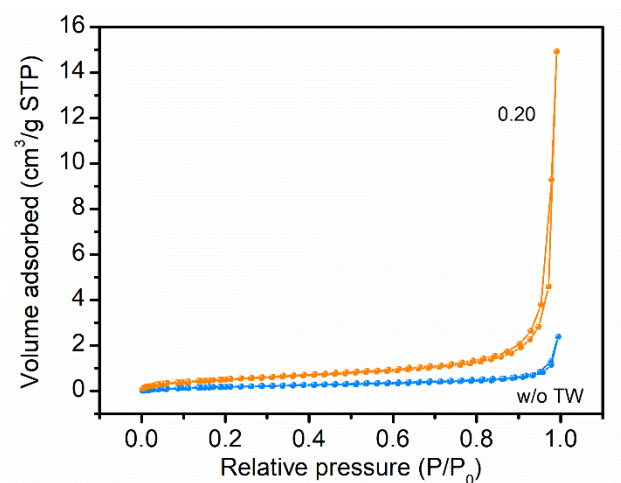

**Figure S7.** N<sub>2</sub> adsorption–desorption isotherm of ZnO powder synthesized using TW/Zn<sup>2+</sup> molar ratio at 0 and 0.20.

**Table S2.** BET surface area of ZnO, as-synthesized ZnO<sub>TW-0.20</sub>, and calcined ZnO<sub>TW-0.20</sub>.

| Sample                                | BET surface area (m <sup>2</sup> /g) |
|---------------------------------------|--------------------------------------|
| ZnO                                   | 9.3                                  |
| as-synthesized ZnO <sub>TW-0.20</sub> | 29.9                                 |
| calcined ZnO <sub>TW-0.20</sub>       | 20.4                                 |

## 7. Kinetics Reaction

The decomposition of MB dye was determined by both pseudo first-order kinetics reaction and pseudo second-order kinetics reaction in order to explain the degradation mechanism. A simplified Langmuir–Hinshelwood model <sup>1</sup> as presented in equation (1) was used to fit the experimental data. The equation is as follows;

$$\ln \frac{[C]}{[C_0]} = k_1 t \quad (1)$$

where  $k_1$  is the first-order kinetics rate constant and can be extracted by the slope of a linear plot between  $\ln (C/C_0)$  versus  $t$ . On the other hand, the pseudo-second-order kinetics rate constant ( $k_2$ ) was evaluated by fitting the experimental data with equation (2) as follows <sup>1</sup>;

$$\frac{1}{[C]} - \frac{1}{[C_0]} = k_2 t \quad (2)$$

The  $k_2$  rate constant was determined from the slope of a linear plot between  $1/C-1/C_0$  versus  $t$ . The extracted  $k_1$  and  $k_2$  values along with R-squared values are summarized in Table S3.

**Table S3.** The rate constants ( $k$ ) of ZnO<sub>TW-0.20</sub> catalysts in photocatalytic and piezo-enhanced photocatalytic activities for MB degradation using first-order and second-order kinetics fitting.

| Activity                             | ZnO <sub>TW-0.20</sub><br>catalysts | Dosage   | First order fitting                            |                | Second order fitting                                              |                |
|--------------------------------------|-------------------------------------|----------|------------------------------------------------|----------------|-------------------------------------------------------------------|----------------|
|                                      |                                     |          | Rate constant<br>( $k_1$ , min <sup>-1</sup> ) | R <sup>2</sup> | Rate constant<br>( $k_2$ , L mg <sup>-1</sup> min <sup>-1</sup> ) | R <sup>2</sup> |
| Photocatalysis                       | As-synthesized                      | 0.25 g/L | 0.0048                                         | 0.9702         | 0.0072                                                            | 0.9892         |
|                                      |                                     | 1.00 g/L | 0.0055                                         | 0.9710         | 0.0087                                                            | 0.9822         |
|                                      | Calcined                            | 0.25 g/L | 0.0079                                         | 0.8876         | 0.0140                                                            | 0.9281         |
|                                      |                                     | 1.00 g/L | 0.0125                                         | 0.9192         | 0.0275                                                            | 0.9805         |
| Piezo-<br>promoted<br>photocatalysis | As-synthesized                      | 0.25 g/L | 0.0107                                         | 0.9969         | 0.0268                                                            | 0.9538         |
|                                      |                                     | 1.00 g/L | 0.0138                                         | 0.8977         | 0.0502                                                            | 0.9674         |
|                                      | Calcined                            | 0.25 g/L | 0.0123                                         | 0.9704         | 0.0330                                                            | 0.9608         |
|                                      |                                     | 1.00 g/L | 0.0220                                         | 0.9890         | 0.1195                                                            | 0.9392         |

**Table S4.** The rate constants ( $k$ ) of ZnO<sub>TW-0.20</sub> catalysts in piezo-enhanced photocatalytic activities for MB, RB and TB degradation using first-order and second-order kinetics fitting

| <b>Dyes</b> <sup>a,b</sup> | <b>First order fitting</b>                     |                | <b>Second order fitting</b>                                       |                | <b>TOC<sup>c</sup>(mg/L)</b> |                      |
|----------------------------|------------------------------------------------|----------------|-------------------------------------------------------------------|----------------|------------------------------|----------------------|
|                            | Rate constant<br>( $k_1$ , min <sup>-1</sup> ) | R <sup>2</sup> | Rate constant<br>( $k_2$ , L mg <sup>-1</sup> min <sup>-1</sup> ) | R <sup>2</sup> | Initial<br>Concentration     | After<br>Degradation |
| Methylene blue<br>(MB)     | 0.0220                                         | 0.9890         | 0.1195                                                            | 0.9392         | 3.7                          | 3.2                  |
| Rhodamine B<br>(RhB)       | 0.0170                                         | 0.9835         | 0.0529                                                            | 0.8837         | 4.9                          | 4.3                  |
| Thymol blue<br>(TB)        | 0.0155                                         | 0.9328         | 0.3336                                                            | 0.9471         | 4.9                          | 3.7                  |

<sup>a</sup> dye concentration is 5 ppm and <sup>b</sup> catalyst dosage is 1.00 g/L (200:1 by weight of ZnO:day)

<sup>c</sup> Standard Method 5301 Total Organic Carbon (TOC)

## 8. Comparison to other works

The comparison of organic-dye degradation efficiency under piezo-promoted photocatalytic effect between our ZnO nanoparticles and other previously published reports is shown in Table S5. [2-7].

**Table S5.** Organic-dye degradation efficiency of various catalysts.

| Catalyst (mg)                                                  | Dyes <sup>†</sup><br>(mg) | Catalyst:<br>dye (wt) | Time<br>(min) | Degradation<br>percentage | Irradiation Condition                                                          | Vibration<br>Condition                | Ref.         |
|----------------------------------------------------------------|---------------------------|-----------------------|---------------|---------------------------|--------------------------------------------------------------------------------|---------------------------------------|--------------|
| ZnO nanoarrays on a steel screen<br>(100)                      | MB (0.5)                  | 200:1                 | 50            | 16%                       | Xe lamp, 500W,<br>0.82 mW·cm <sup>-2</sup>                                     | Ultrasonic,<br>(200 W)                | [2]          |
| FeS/ZnO nanoarrays on a steel<br>screen (100)                  | MB (0.5)                  | 200:1                 | 50            | 97%                       | Xe lamp, 500W,<br>0.82 mW·cm <sup>-2</sup>                                     | Ultrasonic,<br>(200 W)                | [2]          |
| Ag <sub>2</sub> S@ZnO nanowires on carbon<br>fiber cloth (N/A) | MB (0.1)                  | N/A                   | 120           | 100%                      | Solar light, 320-800 nm, 186<br>mW·cm <sup>-2</sup>                            | Ultrasonic, 45 kHz,<br>(100 W)        | [3]          |
| ZnO nanowires on carbon fiber<br>cloth (N/A)                   | MB (0.1)                  | N/A                   | 120           | 88%                       | Solar light, 320-800 nm,<br>186 mW·cm <sup>-2</sup>                            | Ultrasonic, 45 kHz,<br>(100 W)        | [3]          |
| TiO <sub>2</sub> @ZnO core-shell nanofibers<br>(50)            | MO (0.5)                  | 100:1                 | 120           | 88%                       | Mercury lamp, 100 W,<br>365 nm                                                 | Ultrasonic, 40 kHz,<br>(120 W)        | [4]          |
| ZnO nanoparticles<br>(N/A)                                     | RhB (1.0)                 | N/A                   | 90            | 70%                       | Xe lamp, 50 W,<br>30 mW·cm <sup>-2</sup>                                       | Ultrasonic, 40 kHz,<br>(80W)          | [5]          |
| ZnO/BaTiO <sub>3</sub><br>(N/A)                                | RhB (1.0)                 | N/A                   | 90            | 100%                      | Xe lamp, 50 W,<br>30 mW·cm <sup>-2</sup>                                       | Ultrasonic, 40 kHz,<br>(80W)          | [5]          |
| CuS/ZnO nanowires<br>(100)                                     | MB (0.25)                 | 400:1                 | 90            | 100%                      | Xe lamp, 500 W                                                                 | Ultrasonic probe,<br>(200 W)          | [6]          |
| ZnO nanotetrapods<br>(200)                                     | MO (0.5)                  | 400:1                 | 25            | 70%                       | Xe lamp, 500 W                                                                 | Ultrasonic probe,<br>(200 W)          | [7]          |
| ZnO nanoparticles<br>(100)                                     | MB (0.5)                  | 200:1                 | 120           | 93%                       | Black light Fluorescent<br>lamp 20 W, UVA, 365 nm,<br>0.94 mW·cm <sup>-2</sup> | Ultrasonic bath, 40<br>kHz,<br>(120W) | This<br>work |
|                                                                | RhB (0.5)                 | 200:1                 | 120           | 90%                       |                                                                                |                                       |              |
|                                                                | TB (0.5)                  | 200:1                 | 120           | 81%                       |                                                                                |                                       |              |

<sup>†</sup>Methylene blue, methyl orange, rhodamine B and thymol blue are abbreviated for MB, MO, RhB and TB, respectively.

## References

- 1 W. Gao, C. Ran, M. Wang, L. Li, Z. Sun and X. Yao, The role of reduction extent of graphene oxide in the photocatalytic performance of Ag/AgX (X = Cl, Br)/rGO composites and the pseudo-second-order kinetics reaction nature of the Ag/AgBr system, *Phys. Chem. Chem. Phys.*, 2016, **18**, 18219–18226.
- 2 X. Guo, Y. Fu, D. Hong, B. Yu, H. He, Q. Wang, L. Xing and X. Xue, High-efficiency sono-solar-induced degradation of organic dye by the piezophototronic/photocatalytic coupling effect of FeS/ZnO nanoarrays, *Nanotechnology*, 2016, **27**, 1–11.
- 3 Y. Zhang, C. Liu, G. Zhu, X. Huang, W. Liu, W. Hu, M. Song, W. He, J. Liu and J. Zhai, Piezotronic-effect-enhanced Ag<sub>2</sub>S/ZnO photocatalyst for organic dye degradation, *RSC Adv.*, 2017, **7**, 48176–48183.
- 4 H. You, Z. Wu, Y. Jia, X. Xu, Y. Xia, Z. Han and Y. Wang, High-efficiency and mechano-/photo- bi-catalysis of piezoelectric-ZnO@ photoelectric-TiO<sub>2</sub> core-shell nanofibers for dye decomposition, *Chemosphere*, 2017, **183**, 528–535.
- 5 X. Zhou, S. Wu, C. Li, F. Yan, H. Bai, B. Shen, H. Zeng and J. Zhai, Piezophototronic effect in enhancing charge carrier separation and transfer in ZnO/BaTiO<sub>3</sub> heterostructures for high-efficiency catalytic oxidation, *Nano Energy*, 2019, **66**, 104127.
- 6 D. Hong, W. Zang, X. Guo, Y. Fu, H. He, J. Sun, L. Xing, B. Liu and X. Xue, High Piezophotocatalytic Efficiency of CuS/ZnO Nanowires Using Both Solar and Mechanical Energy for Degrading Organic Dye, *ACS Appl. Mater. Interfaces*, 2016, **8**, 21302–21314.
- 7 L. Zhang, D. Zhu, H. He, Q. Wang, L. Xing and X. Xue, Enhanced piezo/solar-photocatalytic activity of Ag/ZnO nanotetrapods arising from the coupling of surface plasmon resonance and piezophototronic effect, *J. Phys. Chem. Solids*, 2017, **102**, 27–33.
